# Supplementary material
Source: PubMed Central journal article supplement (PMC5932207)
Supplement: NIHMS955737-supplement-1.pdf [file NIHMS955737-supplement-1.pdf]

ATGAAACACTGCTGCTGGATCTCGCTCTGTGGTCACTCCTTTTCAGCCCAGGATGGCTGTCATTTTTCTTCCAGGTGTCCCAGAAATTGTACAACGGCTCCTACGAAATCTGTCTCATGAT  
 M K T L L L L D L A L W S L L L F Q P G W L S F S S Q V S Q N C H N G S Y E I S V L M M  
 hgUCY2C

GGGCAATAGCGCCTTTGCCAACCTCTCAAAACCTCGAGGATGCTGTGAATGAGGGACTGGAGATTGTGAGGGGACGACTCCAGAAGCTGGACTGAATGTCACCGTGAATGCCACTTTTCATGT  
 G N S A F A E P L K N L E D A V N E G L E I V R G R L Q N A G L N V T V N A T F M  
 hgUCY2C

ACTCCGATGGCCTCATCATAATAGTGGCGACTGTGGTCTAGCACATGTGAGGGACTGATCTGCTCCGAAAAATTTCCAACGCCAGCGAATGGGATGTGTGCTCATTGGACCTCTTTGTACC  
 Y S D G L I H N S G D C R S S T C E G L D L R K I S N A Q R M G C V L I G P S C T  
 hgUCY2C

TACTCCACATTTAGATGTAACCTCGACACCGAACTGTCTTACCCCATGATCTCTGCGGATCCCTTTGGACTGTCTGTGATTACAAGGAGACACTCACTAGACTCATGTCCCCGCTCGAAAACT  
 Y S T F O M Y L D T E L S Y P M I S A G S F G L S C D Y K E T L T R L M S P A R K L  
 hgUCY2C

CATGTACTTTCTGTGAACCTTGGAAAAACACGACCTGCCCTTCAAAACATCTCTGGTCAACTTACAGCTTACAAAAACGGCACCAGAACGGAGATTGCTTTTGGTACCTCAATGCC  
 M Y F L V N F W K T N D L P F K T Y S W S T S Y V Y K N G T E T E D C F W Y L N A  
 hgUCY2C

TGGAGGCTAGCGTGTCTACTTTAGCCACGAACTCGGATCAAGTCTGTGCTGAGGCGAGATAAGGAGTTCAGGATATTCTCTATGGACCATAACCGAAATCAACGTGATCATGTGTGA  
 L E A S V S Y F S H E L G F K V V L R Q D K E F Q D I L M D H N R K S N V I I M C G  
 hgUCY2C

GGCCTGAATTTCTGTACAACCTCAAGGGCGATAGAGCTGTGGCTGAGGATATTGTCATCATTCTCGTGGATCTTTCAACGACCACTTCCGAGGATAACGTGACTGCTCCGACTACATGAA  
 G P E F L Y K L K G D R A V A E D I V I L V D L F N D Q Y F E D N V T A P D Y M K  
 hgUCY2C

AAACGTCTGGTGTCTACACTGAGTCTGGCAATCCCTGCTGAATTCCTCTTTTCTCGAAACTGTCCCAACAAAAAGGGATTTTGTCTGGCTTACCTGAACGGGATTCTCCTGTTTGGCC  
 N V L V L T L S P G N S L L N S S F S R N L S P T K R D F A L A Y L N G I L L L F G  
 hgUCY2C

ACATGCTCAAAATCTTTCTGGAAAAAGCGAAGACATCACACCCCCAAATTTGCTCACGCCTCCGAAATCTCACTTTTGGGGCTACGACGGACCTGTGACTCTGGACGATTGGGGCGACGTG  
 H M L K I F L E N G E N I T T P K F A H A F R N L T F E G Y D G P V T L D D W G D V  
 hgUCY2C

GATAGCAATGGTGTCTACTACCTCTGTGCTACTAAAAATACAAAGTCTGCTCACCTACGATACTCACGTCAACAAAACCTACCTGTGGATAGAGCCCAACCTTCACTTTGAAAAA  
 D S T M V L L Y T S V D T K K Y K V L L T Y D T H V N K T Y P V D M S P T F T W K N  
 hgUCY2C

CTCCAACCTGCAAAATGATATTACGGGGGAGGACCCAGATCCTCATGATTGCCGTGTTTACCTCACTGGCGTGTGGTCTGCTCCTGCTGGTGGTCTGCTCATGCTGAGAAAAATCCGGAA  
 S K L P N D I T G R G P Q I L M I A V F T L T G A V V L L L L V A L L M L R K Y R  
 hgUCY2C

AGGACTACGAACCTCCGGCAGAAAAAATGGAGCCACATCCCACCTGAAAAACATTTCCCTGGAAACCAATGAGACAAACCAGTGTCCCTGAAAAATCGAGACGACAAACGCCGGATACAATC  
 K D Y E L R Q K K W S H I P P E N I F P L E T N E T N H V S L K I D D D K R R D T I  
 hgUCY2C

CAGAGACTGAGGCACTGTAATACGACAAAAACGAGTGTCTGAAAGACCTCAACACGATGGCAACTTCCAGGAAACAGAAAAATGAGCTGAACAACTGCTCCAGATCGACTACTA  
 Q R L R Q C K Y D K K R V I L K D L K H N D G N F T E K Q K I E L N K L L Q I D Y Y  
 hgUCY2C

CAACCTCAACAAATTTCTACGGAAACCGTCAAACCTGATACCATGATCTTTGGCGTGAATGAATCTGTGAGAGGGGCTCACTGAGAGAAGTGTGAACGACACCATCTTTACCCCGATGGAACCT  
 N L T K F Y G T V K L D T M I F G V I E Y C E R G S L R E V L N D T I S Y P D G T  
 hgUCY2C

TTATGGACTGGGAGTTCAAATCTCCGTGCTCTACGATATGCTAAGGGCATGCTCTACCTCCACTCTTCAAACCGAGGTCCACGGGAGACTCAAATCCACCAACTGTGTGGTCTGACTCTCGA  
 F M D W E F K I S V L Y D I A K G M S Y L H S S K T E V H G R L K S T N C V V D S R  
 hgUCY2C

ATGGTGTGAAAAACACCGACTTGGCTGTAATAGCATCTGCCCTTAAAAAGACCTGTGGACTGCCCTGAACACCTGAGACAGGCCAACATTAGCCAGAAGGGCGACGTCTACTCATACGG  
 M V V K I T D F G C N S I L P P K K D L W T A P E H L R Q A N I S Q K G D V Y S Y G  
 hgUCY2C

GATTATTGCCAGGAAATCATTCTCCGAAAGAGACATTCTACACCTGAGCTGTAGGGATAGAAATGAGAAAAATTTTGGGTGAAAACTCCAATGGAATGAAACCTTTTGGCCCGACCTGT  
 I I A Q E I I L R K E T F Y T L S C R D R N E K I F R V E N S N G M K P F R P D L  
 hgUCY2C

TTCTGGAACTGCCGAGGAGAAAGAGCTGGAAGTCTACCTCTGGTAAAAACTGTTGGGAGGAGGATCCGAAAAACGCCCGACTTCAAAAAAATCGAAACCACCTGGCAGAAATCTTGGCC  
 F L E T A E E K E L E V Y L L V K N C W E E D P E K R P D F K K I E T T L A K I F G  
 hgUCY2C

CTGTTCCAGATCAAAAAATGAATCCTACATGGACACACTATTAGGCGACTCCAGCTGTACTCTAGGAACCTGGAACATCTGGTGGGGAACGAACACAGCTCTACAAAGCCGAGAGGGATCG  
 L F H D Q K N E S Y M D T L I R R L Q L Y S R N L E H L V E E R T Q L Y K A E R D R  
 hgUCY2C

AGCCGATCGGCTGAACCTTTGCTGCTGCTAGACTGGTGGTCAAATCACTGAAGGAGAAAGCTTCTGCTGAACCTGACTGTACGAGGAAGTGAACATCTACTTTTCCGACATTGTGGGCTTTA  
 A D R L N F M L L P R L V V K S L K E K G F V E P E L Y E E V T I Y F S D I V G F  
 hgUCY2C

CAACAATCTGTAATACTCTACCCCAATGGAAGTGGTGTGATGCTCAACGACATCTCAAAATCTTCTGATCATTGTGGATCATCACGATGTGTAAGTGGAAACAACTGGCGACGCTTAC  
 T T I C K Y S T P M E V V D M L N D I Y K S F D H I V D H H D V Y K V E T I G D A Y  
 hgUCY2C

ATGGTGGCTAGTGGACTCCCTAAACGGAATGGGAATAGACACGCTATCGATATTGCAAAATGGCCCTGGAAATCCTGAGCTTTATGGGCACCTTGAACCTGGAACATCTCCCCGGACTGCCAAT  
 M V A S G L P K R N G N R H A I D I A K M A L E I L S F M G T F E L E H L P G L P I  
 hgUCY2C

TTGGATTAGGATCGGCCTCATTCTGGACCTTTGCGCGTGGCGTGGGATCAAAATGCCAGGTTACTGTCTGTTCCGGGATACCGTCAACTACTGCTAGCCGGATGGAATCAACTGGACTGC  
 W I R I G V H S G P C A A G V V G I K M P R Y C L F G D T V N T A S R M E S T G L  
 hgUCY2C

CACTCCGGATTCACTGTCTGGATCCAATCGCCATCCTCAACGGACTGAATCCAGTTCCTGTACGAAAGTGAAGGCGAGACATACCTGAAAGGACGGGGCAACGAAACAACTACTGGCTC  
 P L R I H V S G S T I A I L K R T E C O F L Y E V R G E T Y L K G R G N E T T Y W L  
 hgUCY2C

ACCGGCATGAAAGACCAGAAATTAACCTGCTACCCCTCTACTGTGGAAAAACAGCAGAGACTCCAGGCTGAGTTTAGTGCATGATCGCAATTCACTCCAGAAACGGCAGGCTGTGGCAT  
 T G M K D Q K F N L P T P P T V E N Q Q R L Q A E F S D M I A N S L Q K R Q A A G I  
 hgUCY2C

TAGGAGTCAGAAACCCCGAGAGTGGCTTTTCAAAAAAGGGCACACTGGAATACCTCCAGCTGAACACCACCAGTAAGGAATCCACCTACTTCTAGTGA  
 R S Q K P R R V A S Y K K G T L E Y L Q L N T T D K E S T Y F \* \*  
 hgUCY2C

Supplementary Figure S1. Codon-optimized human GUCY2C sequence
