# Supplementary material
Source: PubMed Central journal article supplement (PMC5932207)
Supplement: NIHMS955737-supplement-6.pdf [file NIHMS955737-supplement-6.pdf]

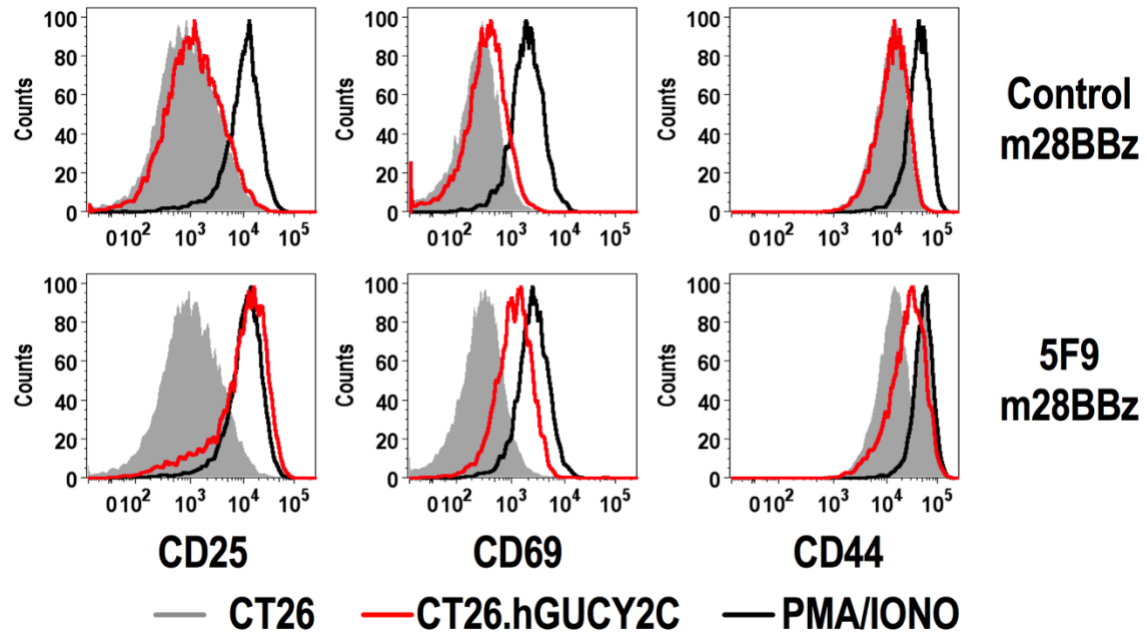

**Supplementary Figure S6. hGUCY2C-expressing mouse colorectal cancer cells activate 5F9.m28BBz CAR-T cells.** 10<sup>6</sup> CAR-T cells were stimulated for 6 h with 10<sup>6</sup> parental CT26, CT26.hGUCY2C colorectal cancer cells or PMA and ionomycin (PMA/IONO). T-cell activation markers (CD25, CD69, or CD44) were quantified by flow cytometry.
