# Supplementary material
Source: PubMed Central journal article supplement (PMC5932207)
Supplement: NIHMS955737-supplement-7.pdf [file NIHMS955737-supplement-7.pdf]

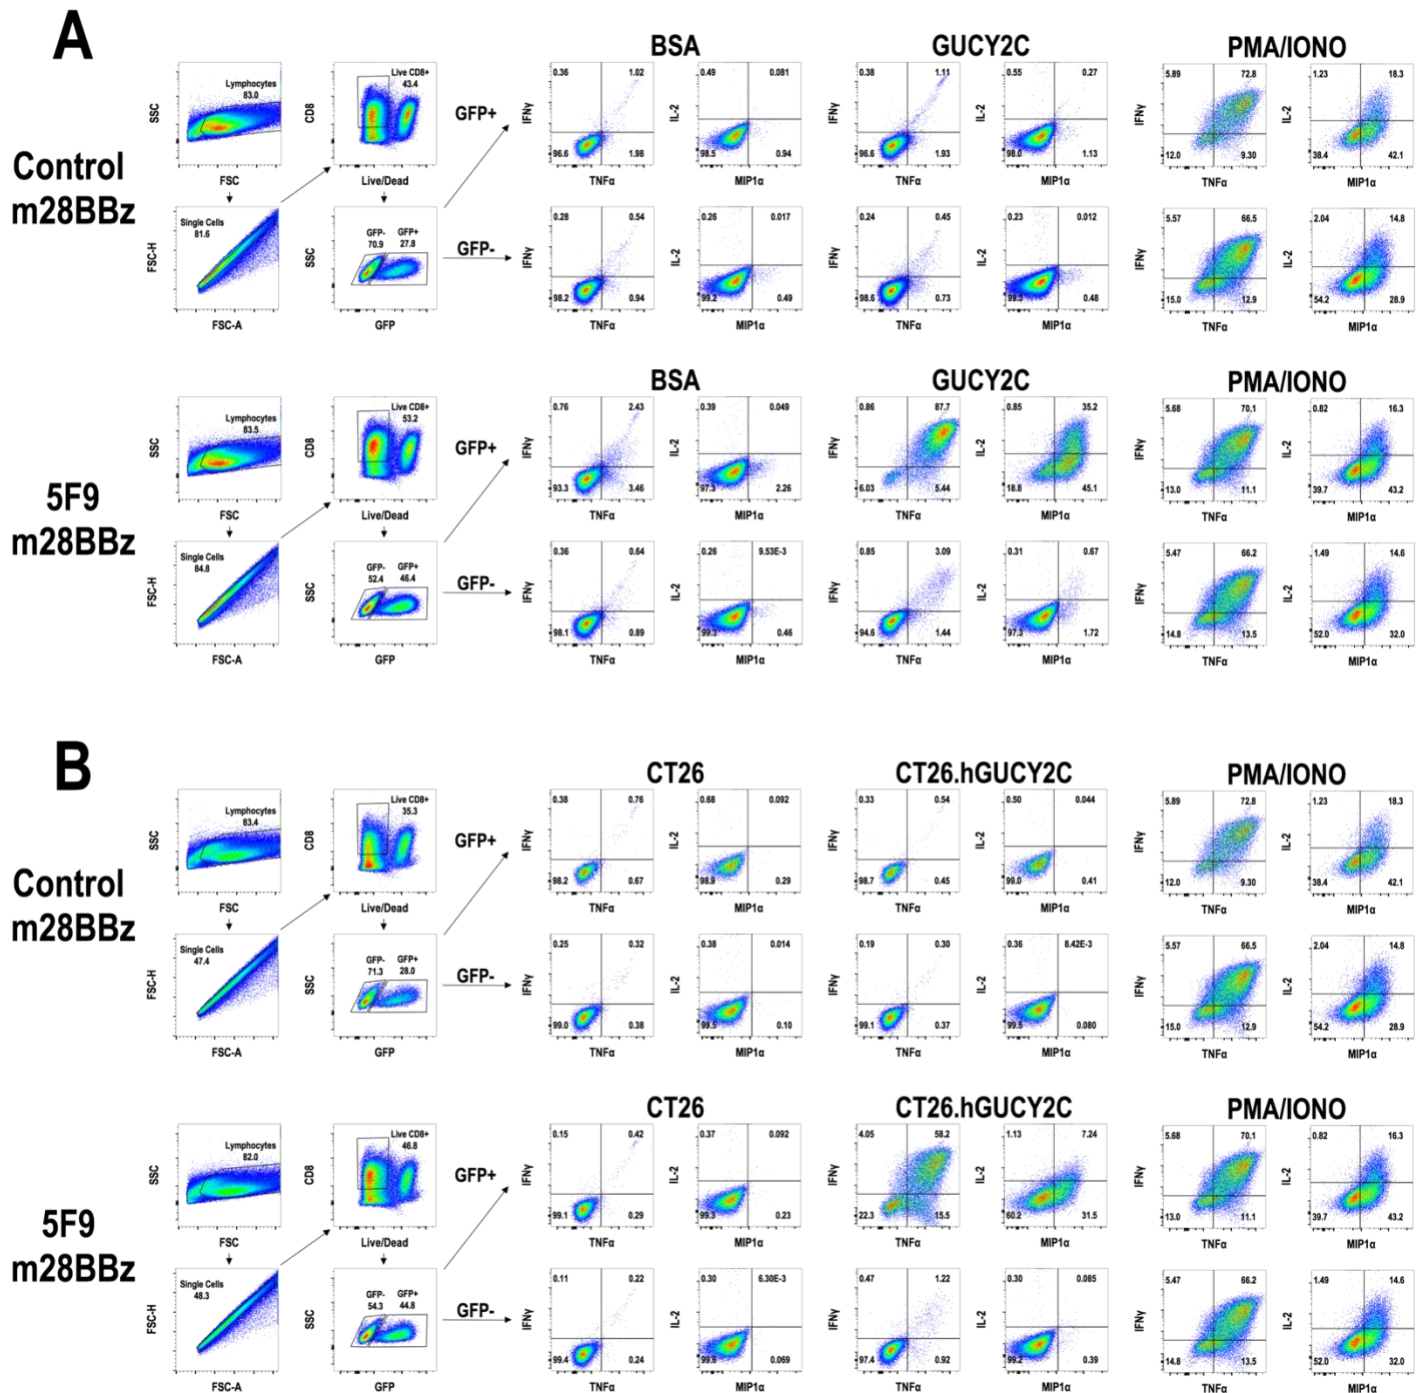

**Supplementary Figure S7 hGUCY2C-expressing mouse colorectal cancer cells induce 5F9.m28BBz CAR-T cell cytokine production.**  $10^6$  CAR-T cells were stimulated for 6 h with plate-coated antigen (A; BSA or hGUCY2C) or  $10^6$  parental CT26 or CT26.hGUCY2C colorectal cancer cells (B), or PMA and ionomycin (PMA/IONO). Intracellular cytokine production (IFN $\gamma$ , TNF $\alpha$ , IL-2 or MIP1 $\alpha$ ) was quantified by flow cytometry.
