# Supplementary material
Source: PubMed Central journal article supplement (PMC5932207)
Supplement: NIHMS955737-supplement-8.pdf [file NIHMS955737-supplement-8.pdf]

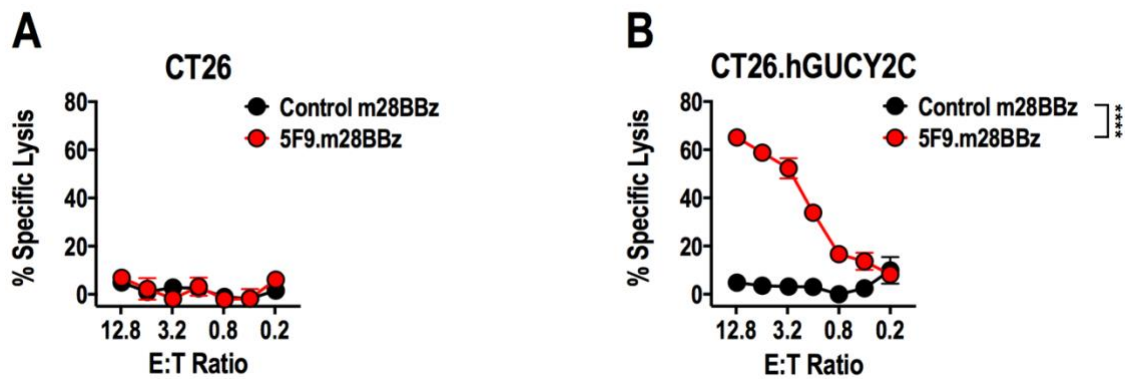

**Supplementary Figure S8. 5F9.m28BBz CAR-T cells kill hGUCY2C-expressing mouse colorectal cancer cells.**  $\beta$ -galactosidase-expressing CT26 or CT26.hGUCY2C mouse colorectal cancer cells were cultured for 4 h with a range of effector CAR-T cell : target cancer cell ratios (E:T Ratio). Specific lysis was determined by  $\beta$ -galactosidase release into the supernatant detected by a luminescent substrate. \*\*\*\*,  $p < 0.0001$  (Two-way ANOVA).
