# Supplementary material
Source: PubMed Central journal article supplement (PMC5932207)
Supplement: NIHMS955737-supplement-9.pdf [file NIHMS955737-supplement-9.pdf]

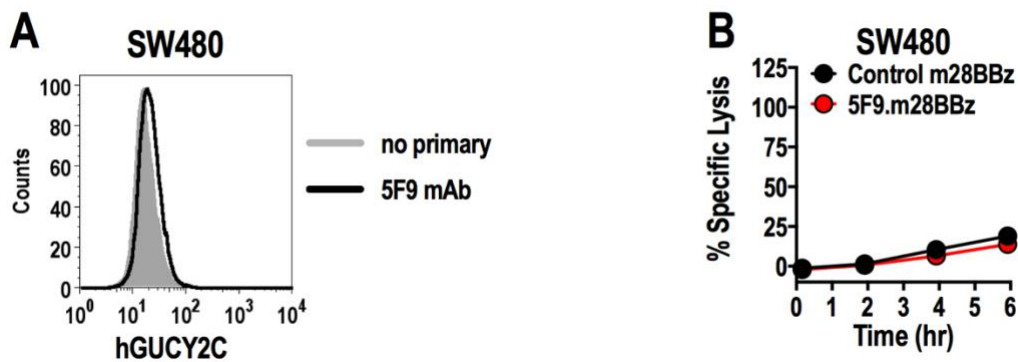

**Supplementary Figure S9. 5F9.m28BBz CAR-T cells do not kill hGUCY2C-deficient human colorectal tumors.** (A) hGUCY2C expression on SW480 human colorectal cancer cells was quantified by flow cytometry using the recombinant 5F9 antibody. (B) SW480 cells in an E-Plate were treated with 5F9.m28BBz or control 1D3.m28BBz CAR-T cells, media, or 2.5% Triton-X 100 (Triton) and the relative electrical impedance was quantified every 15 min for 20 h to quantify cancer cell death (normalized to time=0). Percent specific lysis values were calculated using impedance values following the addition of media and Triton for normalization (0% and 100% specific lysis, respectively).
