# Supplementary material
Source: PubMed Central journal article supplement (PMC5932207)

## 5F9.m28BBz

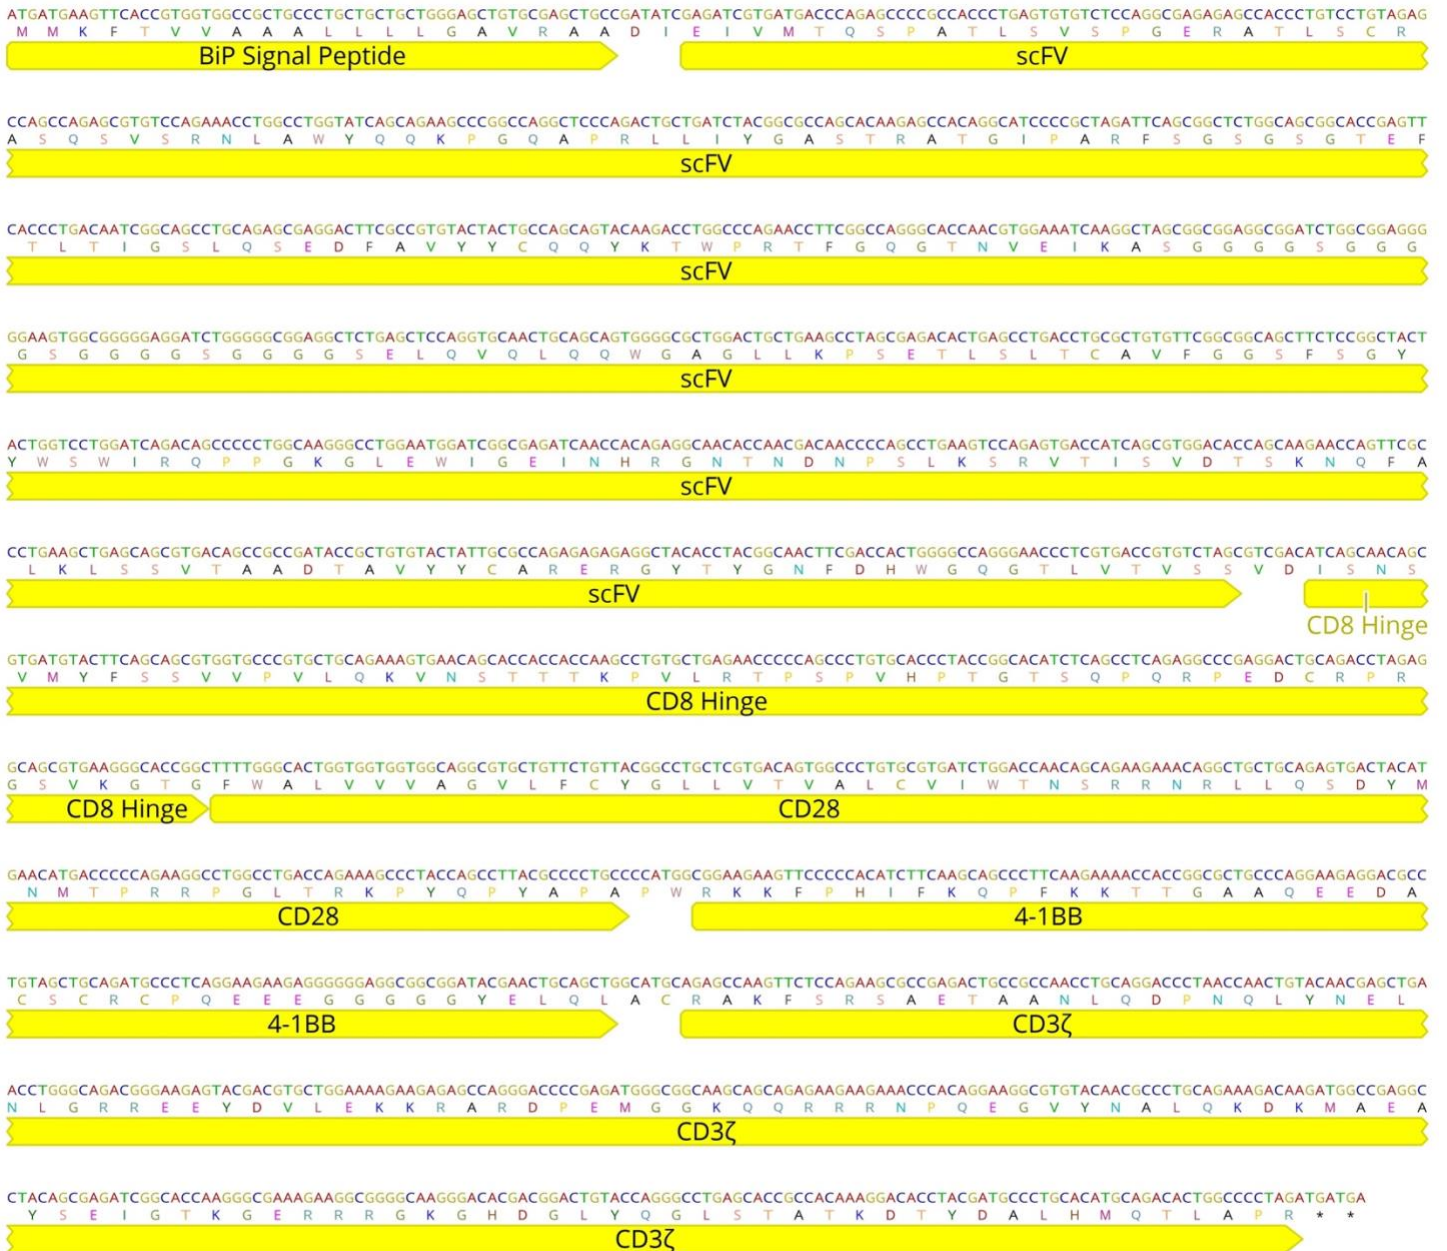

Supplementary Figure S3. 5F9.m28BBz sequence.

Supplement: NIHMS955737-supplement-3.pdf [file NIHMS955737-supplement-3.pdf]

## 5F9.h28BBz

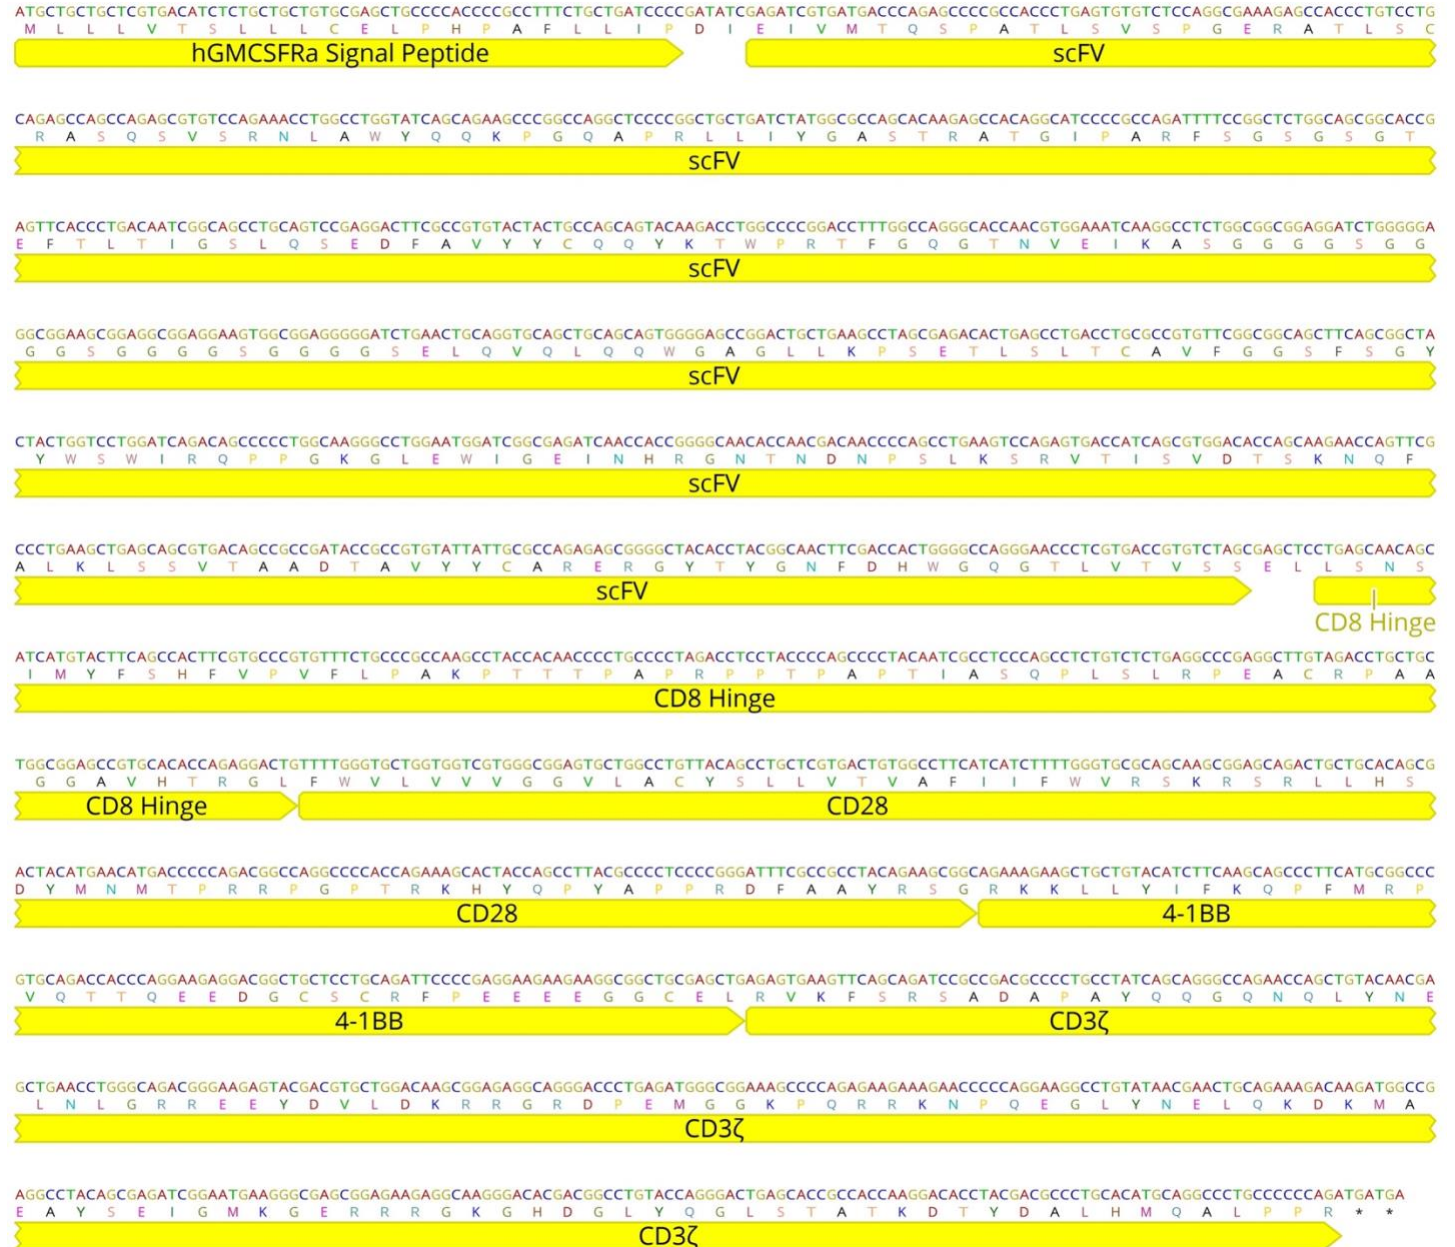

Supplementary Figure S4. 5F9.h28BBz sequence.

Supplement: NIHMS955737-supplement-4.pdf [file NIHMS955737-supplement-4.pdf]
